# Supplementary material for: Efficient conversion of glucose into 5-hydroxymethylfurfural using a bifunctional Fe3+ modified Amberlyst-15 catalyst
Source: Royal Society of Chemistry journal article supplement (doi:10.1039/c8se00499d), 2018-11-29
Supplement: c8se00499d1.pdf [file c8se00499d1.pdf]

## Electronic Supplementary Information

### **Efficient conversion of glucose into 5-hydroxymethylfurfural using a bifunctional Fe<sup>3+</sup> modified Amberlyst-15 catalyst.**

Siquan Xu <sup>a</sup>, Chunyu Yin <sup>b</sup>, Donghui Pan <sup>a</sup>, Feng Hu <sup>a</sup>, Yuanfeng Wu <sup>a</sup>, Yanan Miao <sup>a</sup>,  
Lijing Gao <sup>a</sup>, Guomin Xiao <sup>a\*</sup>

<sup>a</sup> School of Chemistry and Chemical Engineering, Southeast University, Nanjing  
211189, China

<sup>b</sup> School of Pharmacy, Nanjing Medical University, Nanjing, 211189, China

\* Corresponding author: Guomin Xiao

Tel: +86-25-52090612; Fax: +86-25-52090612;

E-mail: xiaogm@seu.edu.cn;

**Table S1.** Comparisons of catalytic behavior of 10%-Fe/AR and representative catalytic systems for conversion of glucose to HMF

| Entry | Catalyst                                                           | Reaction system          | Load <sup>a</sup> | Temperature<br>(°C) | Time<br>(min) | HMF yield<br>(%) | Ref       |
|-------|--------------------------------------------------------------------|--------------------------|-------------------|---------------------|---------------|------------------|-----------|
| 1     | SAPO-34                                                            | GVL                      | 6.2%              | 170                 | 40            | 93.6             | 26        |
| 2     | Al-MCM-41                                                          | H <sub>2</sub> O/MIBK    | 3.4%              | 195                 | 150           | 63               | 27        |
| 3     | Nb-SBA-15                                                          | H <sub>2</sub> O/THF     | 1.3%              | 165                 | 180           | 61.8             | 28        |
| 4     | H <sub>3</sub> PO <sub>4</sub> -SiO-FePO <sub>4</sub> <sup>b</sup> | H <sub>2</sub> O/acetone | 4.0%              | 170                 | 100           | 76.3             | 29        |
| 5     | SiO <sub>2</sub> -ATS-PTA <sup>c</sup>                             | H <sub>2</sub> O/acetone | 4.7%              | 160                 | 140           | 78.3             | 30        |
| 6     | Sn-Beta/HCl                                                        | H <sub>2</sub> O         | 10.0%             | 140                 | 120           | 57               | 31        |
| 7     | CrCl <sub>3</sub>                                                  | [EMIM]Cl                 | 6.0%              | 80                  | 180           | 70               | 32        |
| 8     | 10%-Fe/AR                                                          | H <sub>2</sub> O/THF     | 1.3%              | 160                 | 60            | 68               | This work |

<sup>a</sup> Load =  $m_{\text{glucose}} / (m_{\text{glucose}} + m_{\text{solvent}})$

<sup>b</sup> silica-supported phosphate and iron phosphate

<sup>c</sup> silica-supported phosphotungstic acid

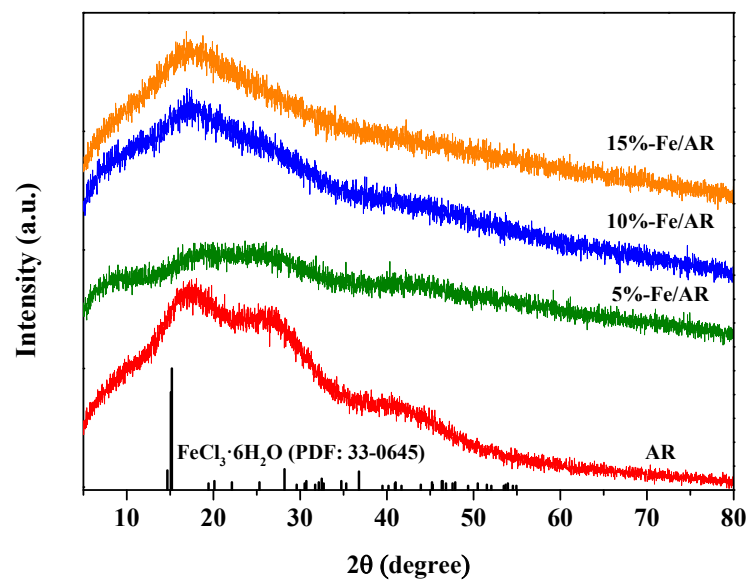

**Fig. S1.** XRD patterns of 5%-Fe/AR, 10%-Fe/AR and 15%-Fe/AR catalysts.

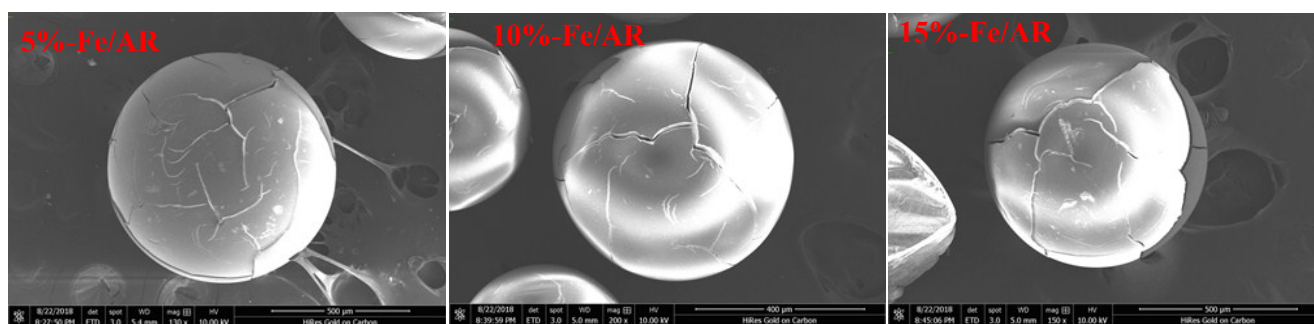

**Fig. S2.** SEM images of 5%-Fe/AR, 10%-Fe/AR and 15%-Fe/AR catalysts.

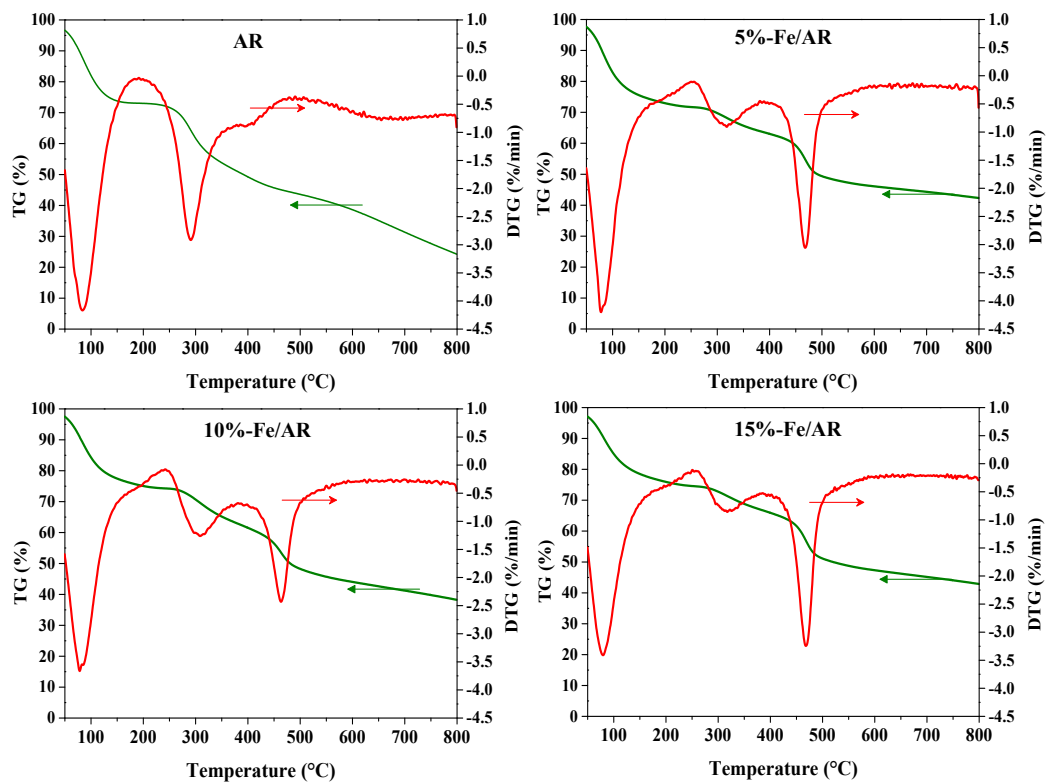

**Fig.S3.** Thermogravimetric analysis of 5%-Fe/AR, 10%-Fe/AR and 15%-Fe/AR catalysts.

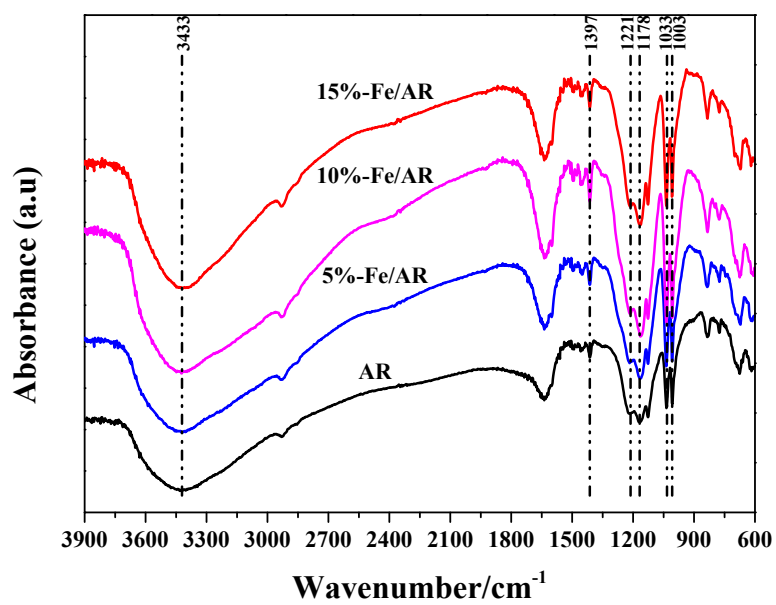

**Fig. S4.** FTIR spectroscopy analysis of the Fe/AR catalysts.

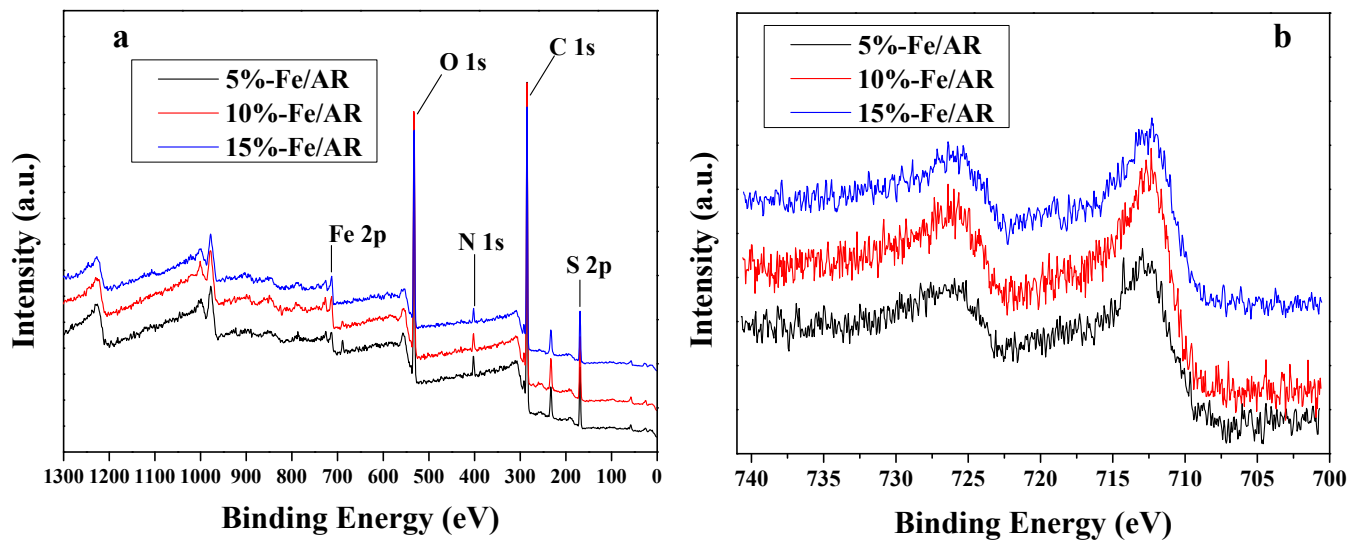

Fig.S5. XPS spectra of the Fe/AR catalysts (a) and the Fe 2p region (b).

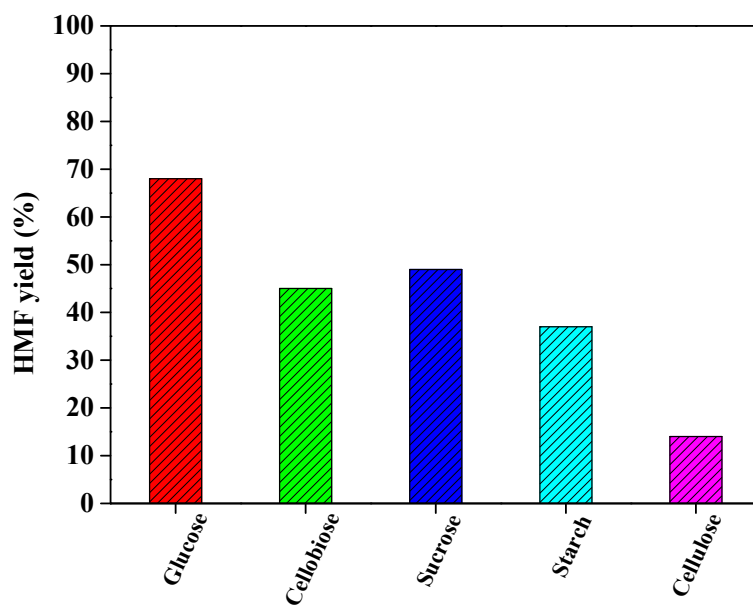

**Fig. S6.** The effect of different substrates on HMF yield.

Reaction conditions: substrate (1.0 g), 10%-Fe/AR (0.2 g), H<sub>2</sub>O (10 mL), THF (30 mL), NaCl (3.5 g) and 160 °C.



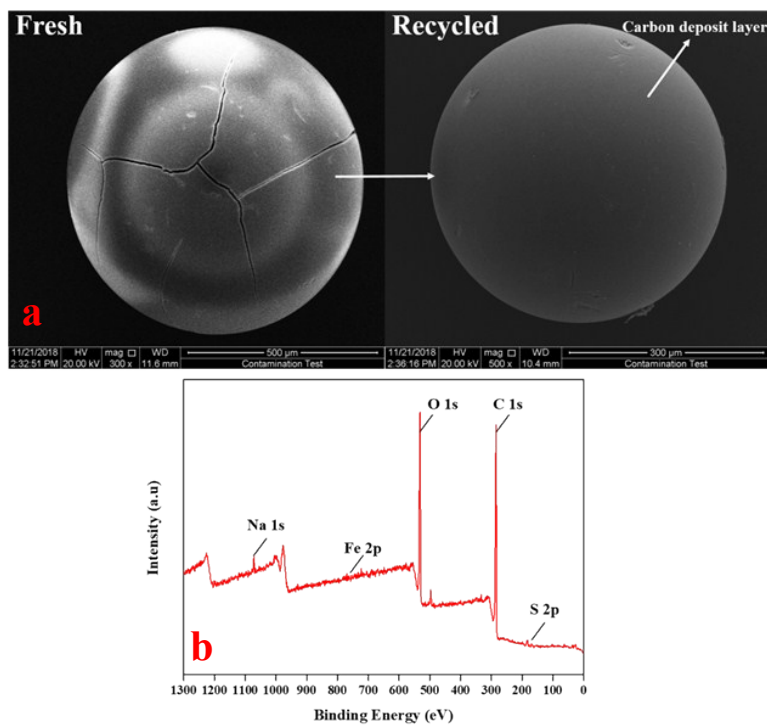

**Fig. S7.** SEM and XPS analysis of the spent 10%-Fe/AR.

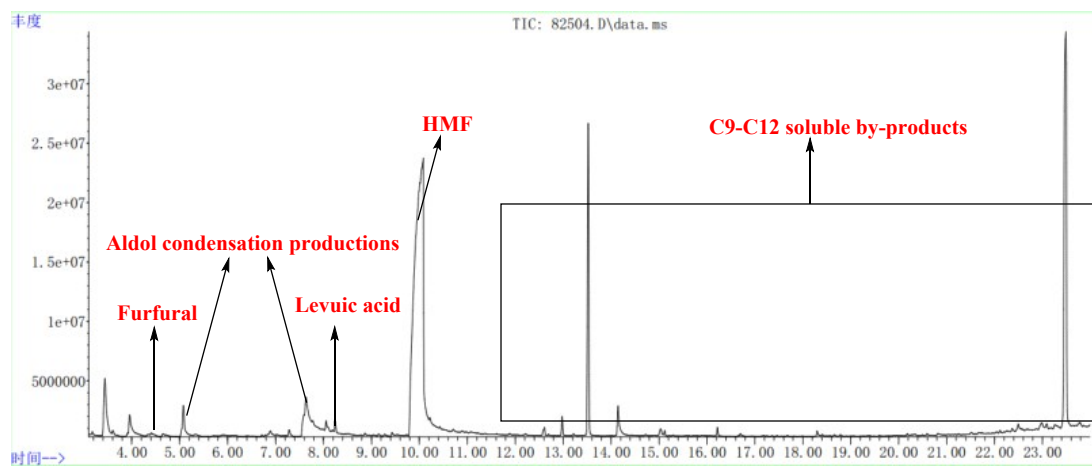

**Fig. S8.** GC-MS plot for the liquid products produced from the catalytic conversion of glucose at 160 °C.

Reaction conditions: glucose (1.0 g), 10%-Fe/AR (0.2 g), H<sub>2</sub>O (10 mL), THF (30 mL), NaCl (3.5 g), 160 °C and 60 min.

The products were analyzed by a GC chromatography (Agilent Technologies 7890A) equipped with a capillary column (Agilent PH-5; 0.32 mm × 30 m) and flame ionization detector (FID) under ramping temperature from 40 to 280 °C. Mass spectrometric analysis of the liquid products was performed with a 5975C inert MSD mass analyzer (Agilent Technologies) employing Triple-Axis Detector.

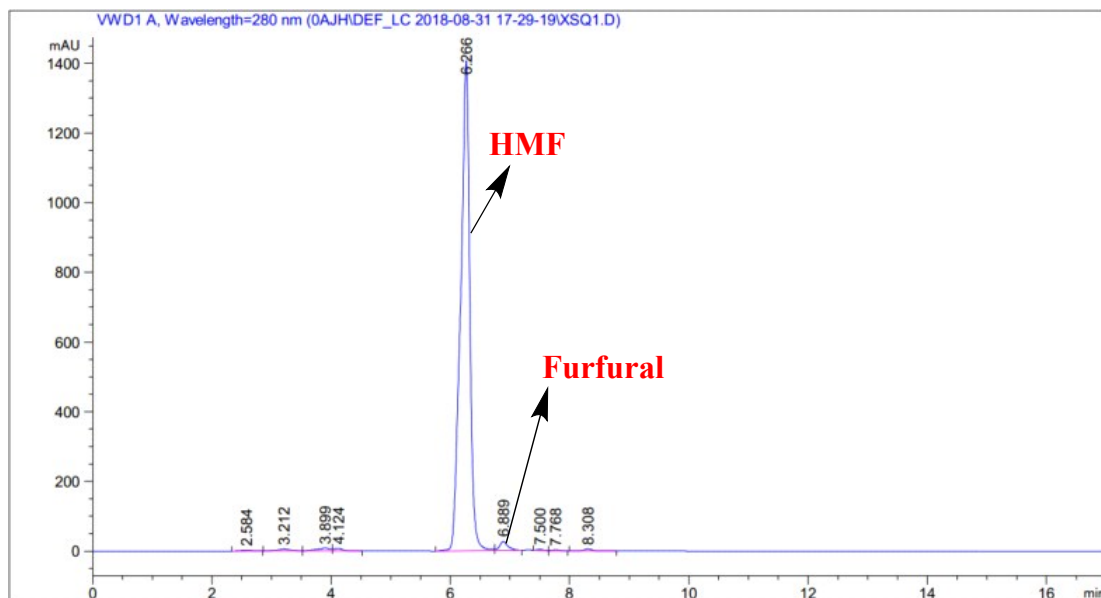

**Fig.S9.** HPLC analysis (UV detector) of the liquid products produced from the catalytic conversion of glucose.

Reaction conditions: glucose (1.0 g), 10%-Fe/AR (0.2 g), H<sub>2</sub>O (10 mL), THF (30 mL), NaCl (3.5 g), 160 °C and 60 min.

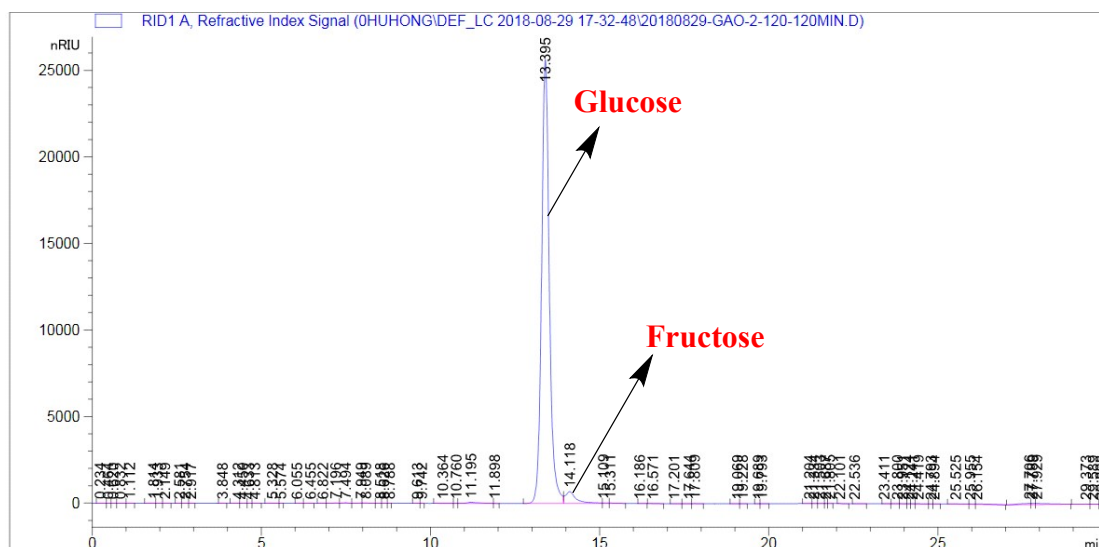

**Fig.S10.** HPLC analysis (Refractive index detector) of the liquid products produced from the catalytic conversion of glucose.

Reaction conditions: glucose (1.0 g), 10%-Fe/AR (0.2 g), H<sub>2</sub>O (10 mL), THF (30 mL), NaCl (3.5 g), 140 °C and 60 min.
